# Supplementary material
Source: ML conference proceedings conference paper supplement (https://openaccess.thecvf.com/content/CVPR2026/html/Borhan_Reliable_Policy_Transfer_CVPR_2026_paper.html)

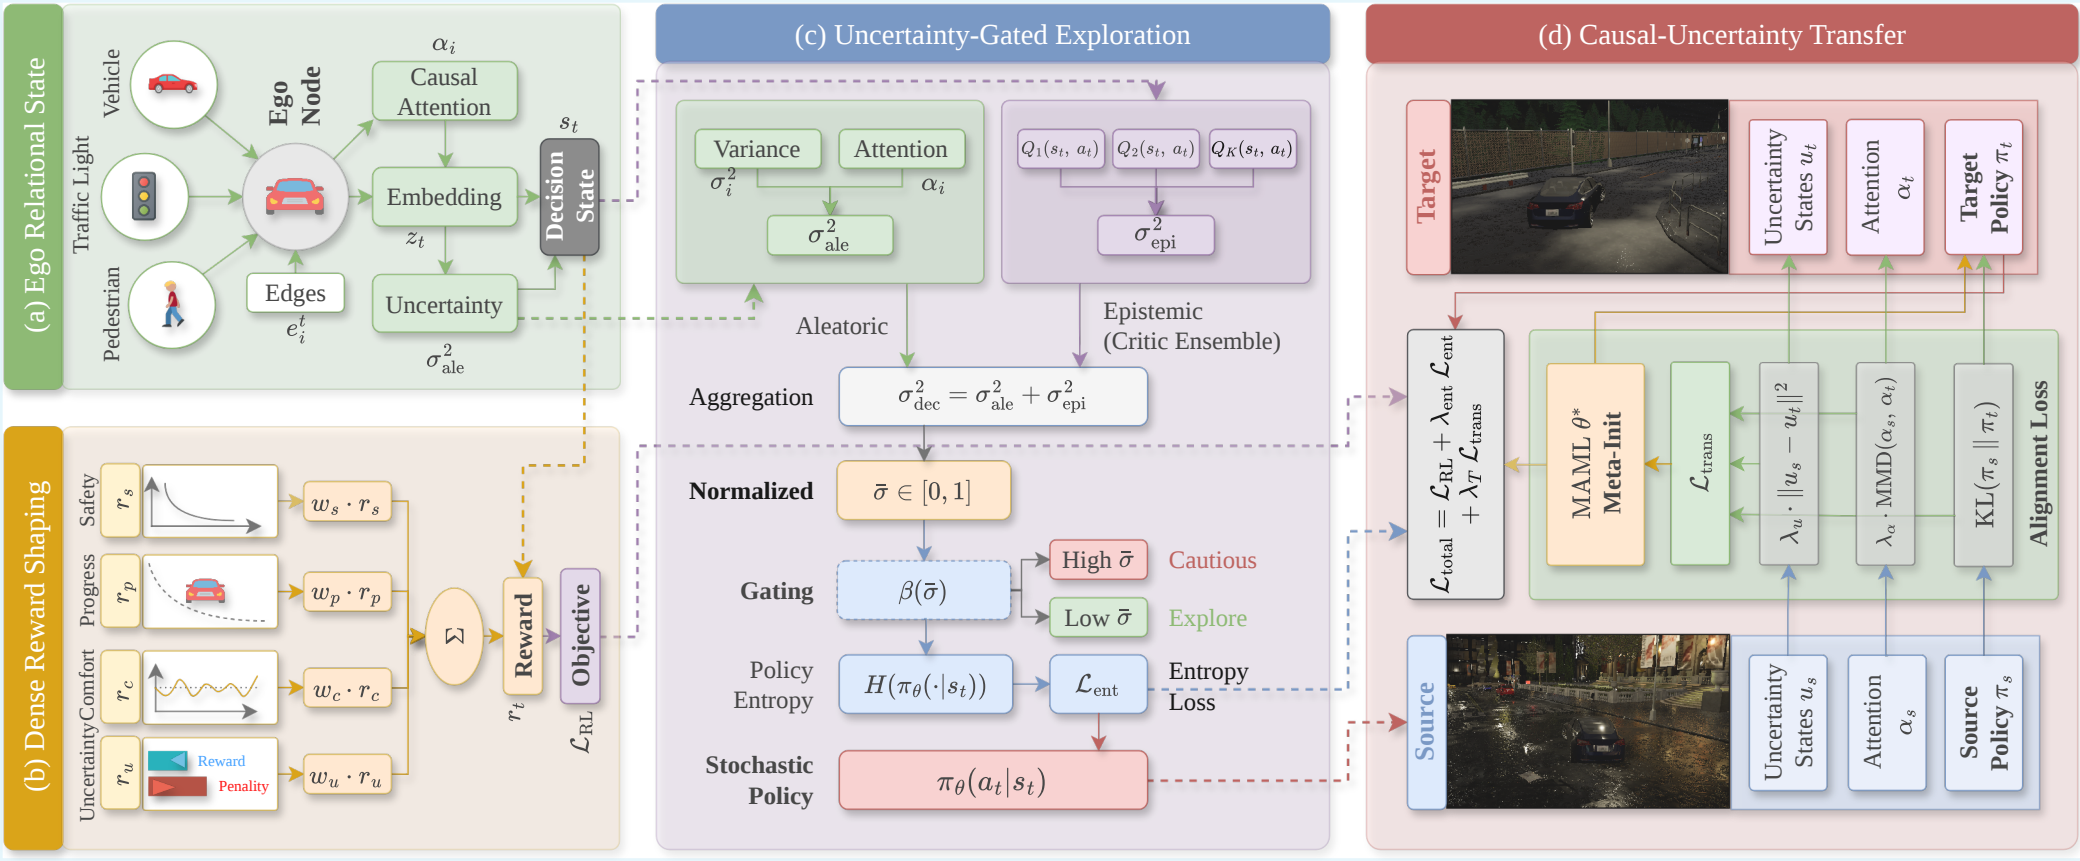

Supplement: Supplementary file 1 [file unified_framework.pdf › safe-driving-drl-main/diagrams/unified_framework.pdf]

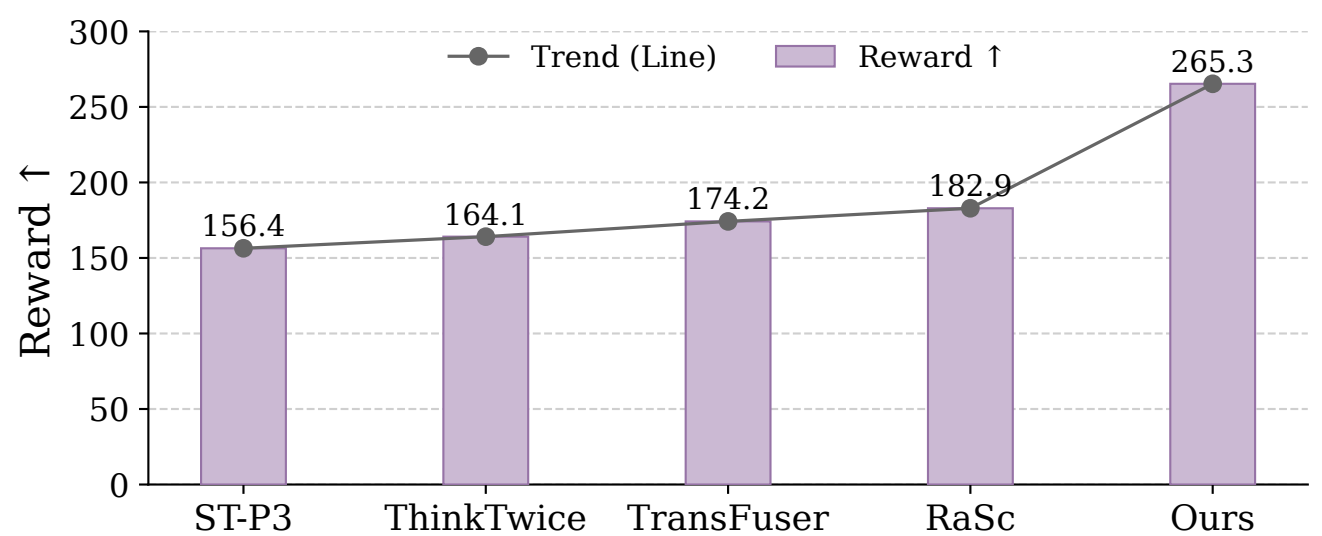

Supplement: Supplementary file 2 [file reward_comparison.pdf › safe-driving-drl-main/graphs/reward_comparison.pdf]

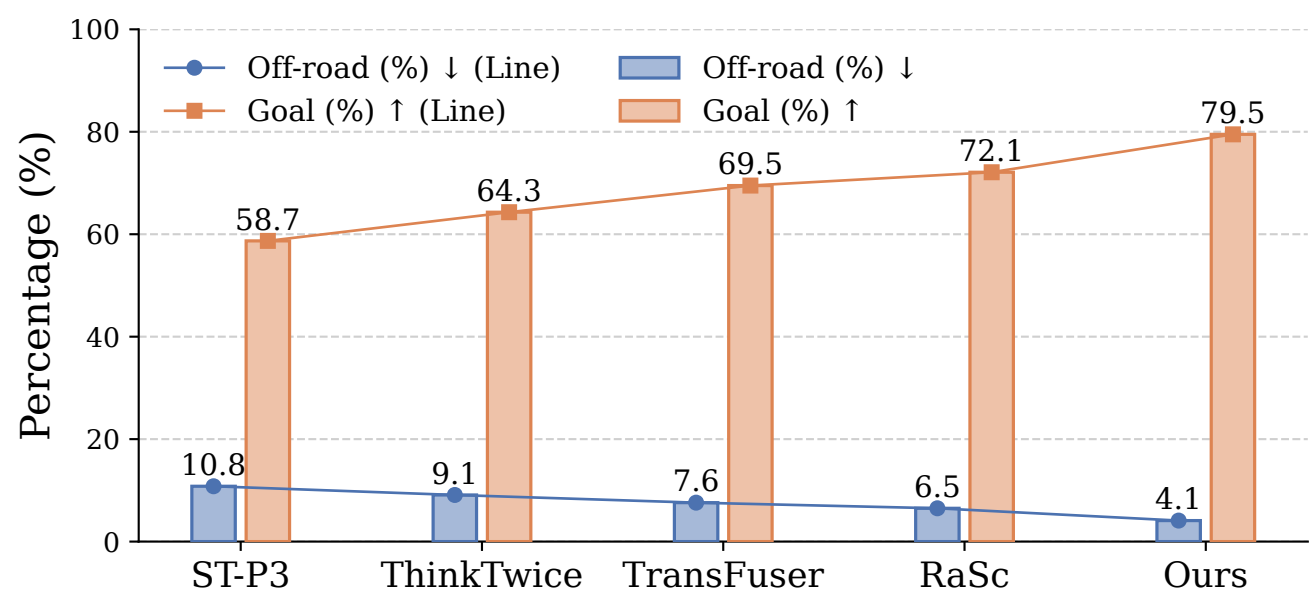

Supplement: Supplementary file 3 [file state_route.pdf › safe-driving-drl-main/graphs/state_route.pdf]

Metric Value

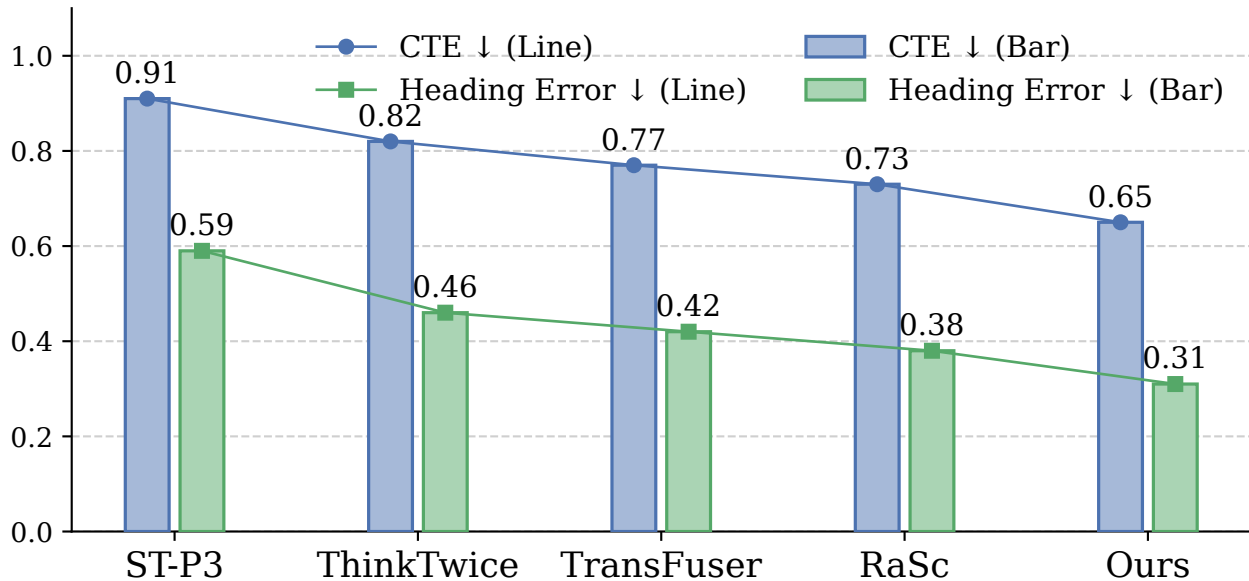

Supplement: Supplementary file 4 [file state_stability.pdf › safe-driving-drl-main/graphs/state_stability.pdf]

Metric Value

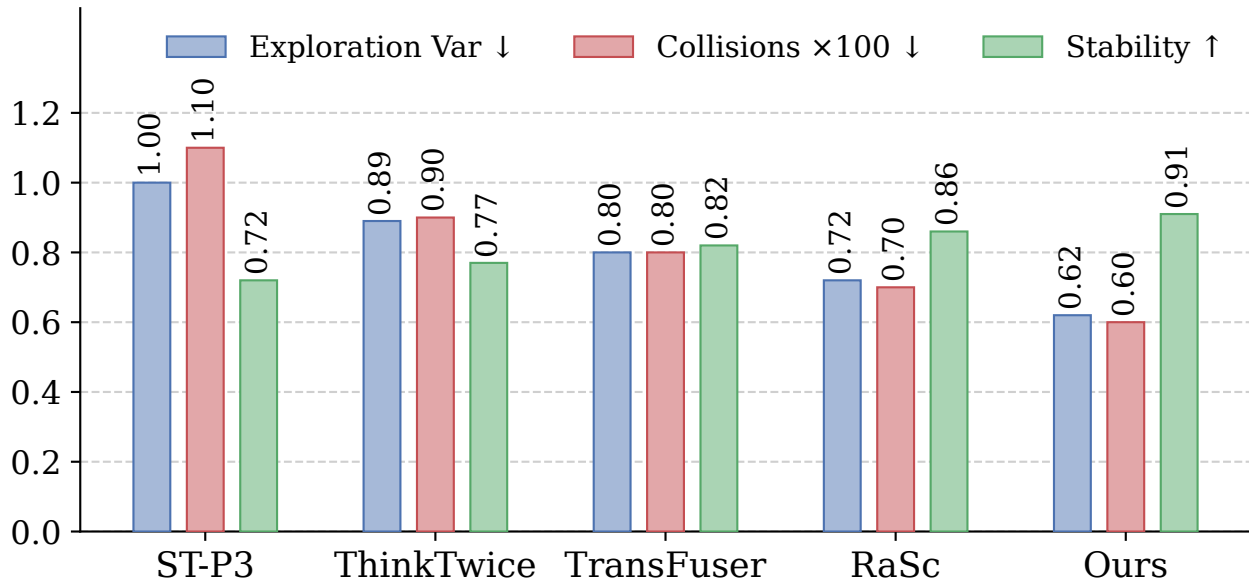

Supplement: Supplementary file 5 [file uncertainty_metrics.pdf › safe-driving-drl-main/graphs/uncertainty_metrics.pdf]
